# Supplementary material for: DeepCellEss: cell line-specific essential protein prediction with attention-based interpretable deep learning
Source: PubMed Central journal article supplement (PMC9825760; doi:10.1093/bioinformatics/btac779), 2022-12-02
Supplement: btac779_supplementary_data.pdf [file btac779_supplementary_data.pdf]

## **Supplementary materials:**

# **DeepCellEss: Cell line-specific essential protein prediction with attention-based interpretable deep learning**

Yiming Li<sup>1</sup>, Min Zeng<sup>1</sup>, Fuhao Zhang<sup>1</sup>, Fang-Xiang Wu<sup>2</sup>, and Min Li<sup>1,\*</sup>

<sup>1</sup>Hunan Provincial Key Lab on Bioinformatics, School of Computer Science and Engineering, Central South University, Changsha, 410083, China.

<sup>2</sup>Division of Biomedical Engineering, Department of Computer Science, Department of Mechanical Engineering University of Saskatchewan Saskatoon, SK S7N 5A9, Canada.

**Contact:** limin@mail.csu.edu.cn

### **The supplementary file includes:**

#### **1. Supplementary Figures**

**Fig. S1.** Heatmaps of pairwise Pearson correlation coefficients for essential protein data across cell lines of different cancer types.

**Fig. S2.** The local connectivity information of DDX59.

**Fig. S3.** JAMM motif and prediction results for PSMD14 using DeepCellEss.

**Fig. S4.** Prediction results of NFE2L2 using DeepCellEss.

**Fig. S5.** User interface of DeepCellEss web server for cell line-specific essential protein prediction.

#### **2. Supplementary Tables**

**Table S1.** The AUROC and AUPRC of DeepCellEss on the independent test sets of 323 cell lines

# 1. Supplementary Figures

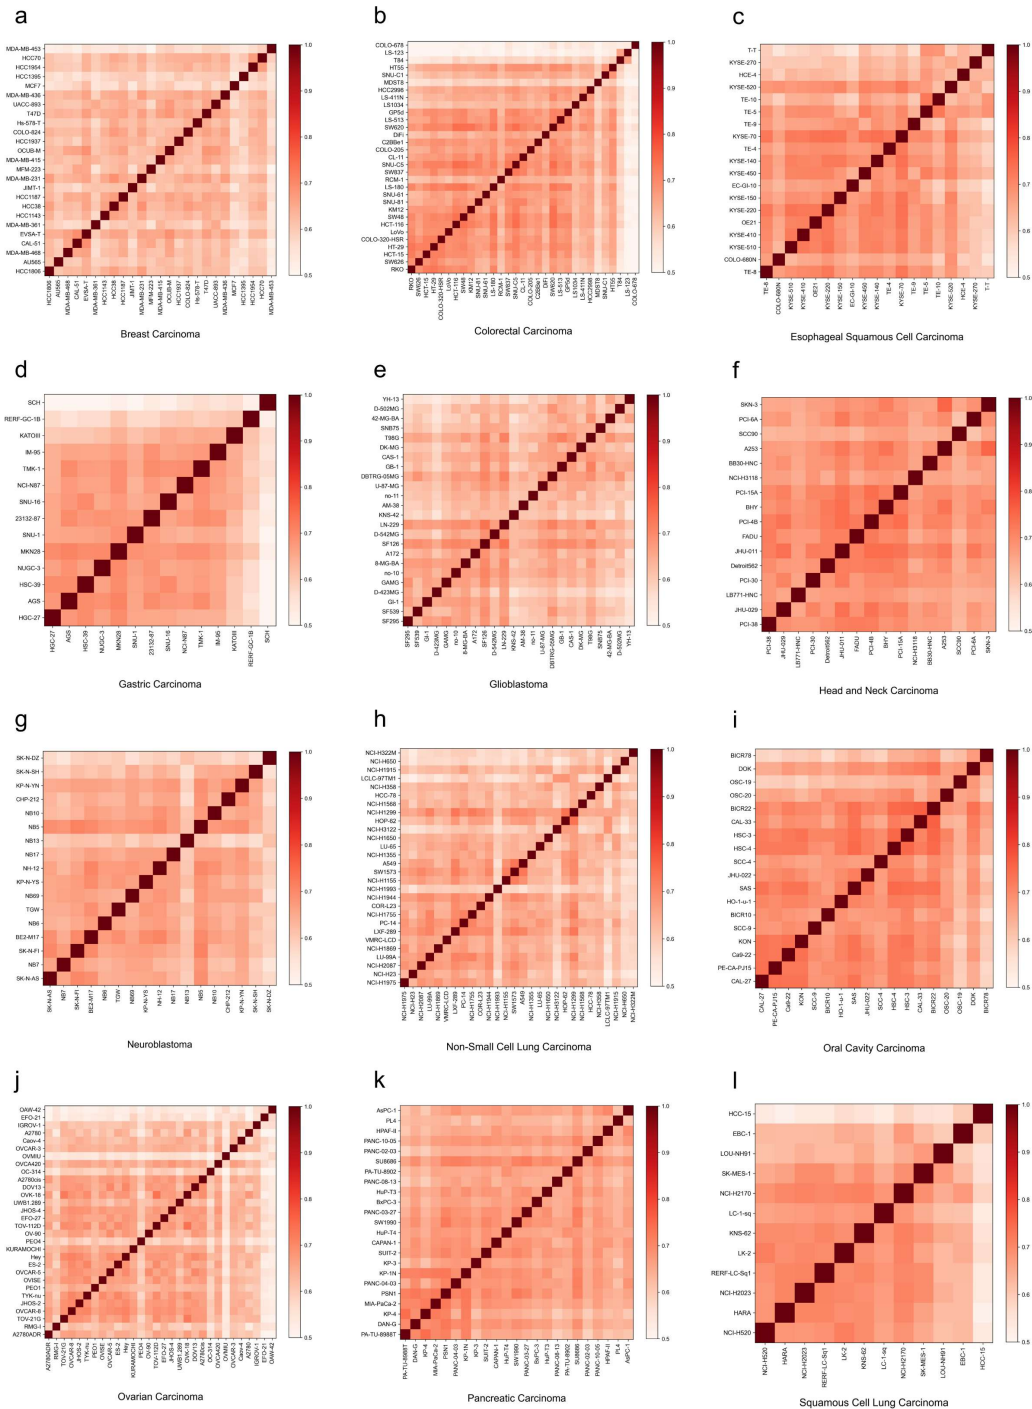

**Fig. S1.** Heatmaps of pairwise Pearson correlation coefficients for essential protein data across cell lines of different cancer types. (a) Breast carcinoma. (b) Esophageal squamous cell carcinoma. (c) Gastric carcinoma. (d) Glioblastoma. (e) Head and neck carcinoma. (f) Neuroblastoma. (g) No-small cell lung carcinoma. (h) Oral cavity carcinoma. (i) Ovarian carcinoma. (j) Pancreatic carcinoma. (k) Squamous cell lung carcinoma.

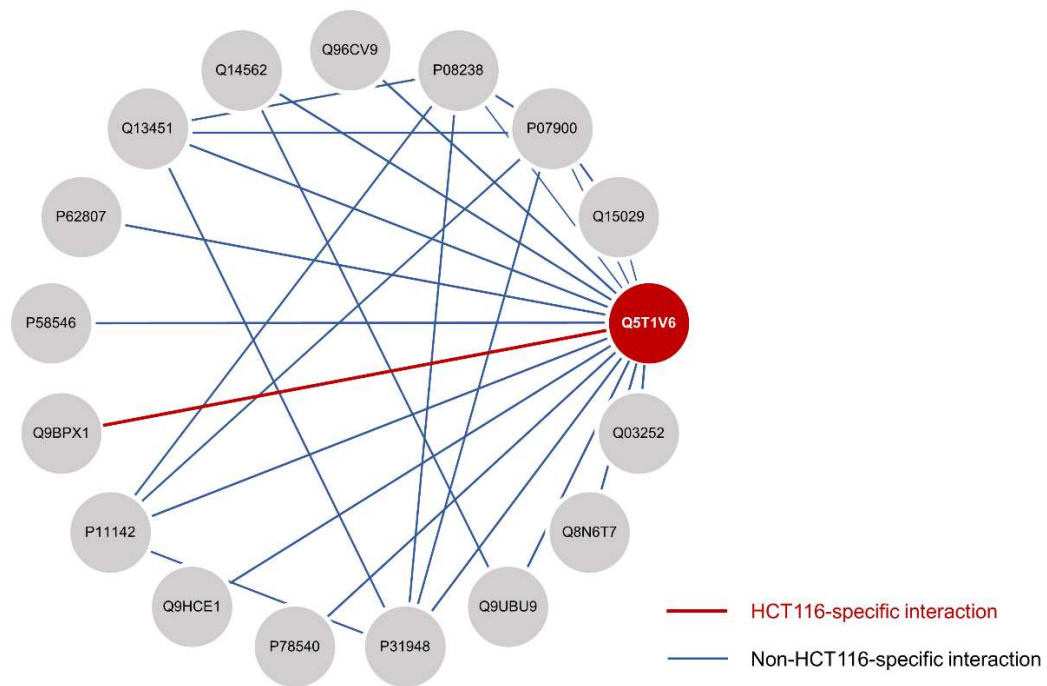

**Fig. S2.** The local connectivity information of DDX59 (Uniprot ID: Q5T1V6). Red lines represent the interactions existing in HCT 116 cell line, blue lines represent the interactions existing in other cell lines.

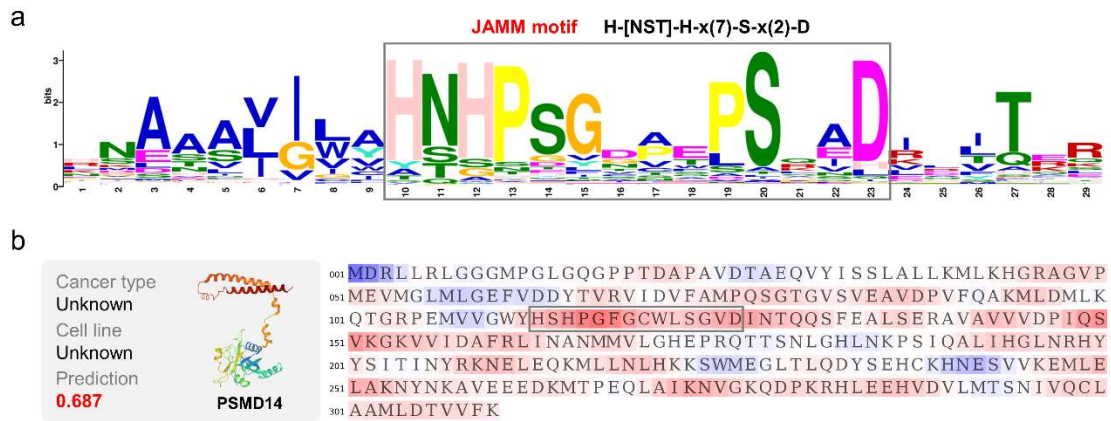

**Fig. S4.** JAMM motif and prediction results for PSMD14 (Uniport ID: O00487) using DeepCellEss. (a) The JAMM motif logo generated from JAMM-containing proteins in UniprotKB database using the MEME tool. (b) Visualization heatmap of O00487 under “Unknown” cancer type and “Unknown” cell line option. The functional conserved motif JAMM (marked by grey boxes) is detected and highlighted by DeepCellEss.

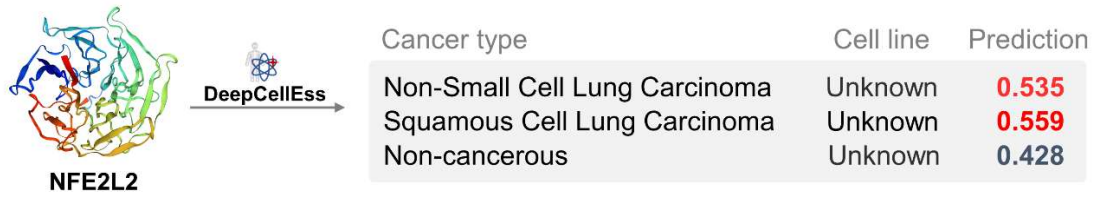

**Fig. S5.** Prediction results of NFE2L2 (Uniport ID: Q16236) using DeepCellEss. The cancer type options are set to “Non-Small Cell Lung Carcinoma”, “Squamous Cell Lung Carcinoma”, and “No-cancerous”, respectively. The cell line options are set to “Unknown”.

error\_reporting(E\_ALL ^ E\_NOTICE);  
 POST /DataRetrieve HTTP/1.1  
 Host: 192.168.1.1  
 Content-Type: application/octet-stream

# DeepCellEss

An interpretable deep learning-based cell line-specific essential protein predictor

**Introduction**  
 DeepCellEss is a computational framework to predict human cell line-specific essentialities of proteins by using interpretable deep learning techniques based on multi-head self-attention mechanism.

**Overview**

The diagram illustrates the DeepCellEss architecture. It starts with a 'Protein Sequence' which is processed by a 'CNN' layer. The output goes through a 'MLP' layer, which includes 'Linear', 'ReLU', and 'Linear' sub-layers. This is followed by a 'Bi-LSTM' layer. The final output is a 'Prediction'.

**Materials**  
 Code and datasets can be obtained from [here](#).

**References**  
 DeepCellEss: Cell line-specific essential protein prediction with attention-based interpretable deep learning.

**Input**

1. Predictor supports **protein ID search** from UniProt database (e.g., P24385) or accepts **single amino acid sequence** (in *FASTA format*) with length less than 1000aa as input.  
**Note:** longer sequences will take much longer to predict.

P24385

```
>sp|P24385|CCND1_HUMAN G1/S-specific cyclin-D1 OS=Homo sapiens OX=9606 GN=CCND1 PE=1 SV=1
MEHQLLCCVEVETIRRAYPDANLLNDRVLRAMLKAEETCAPSVSYFKCVQKIVLPSMRKIY
ATWMLVCEEQKCEEEVFLAMNYLDRFLSLEPVKRSRLQLLGATCMFVASKMKETIPLT
AEKLCIYTDNSIRPEELLQMEILLVNLKWNLAAMPDFIEHFLSKMPEAEENKQIIRK
HAQTFVALCATDVRFISNPPSMVAAGSVAAVQGLNLRSPANFLSYRLTRFLSRVTRKCD
PDCLRACQEQTEALLLESSLRQAQQNMDPKAAEEEEEEEEVLDLACTPTDVRDVI
```

2. Please select the **cancer type** and the **cell line** of the input protein you want to predict.  
**Note:** the "Unknown" option will take much longer than the option for a specific cell line.  
**Cancer type:**  **Cell line:**

**Output**

| Cell line | Protein ID            | Length | Essentiality Score | Prediction Result |
|-----------|-----------------------|--------|--------------------|-------------------|
| Unknown   | sp P24385 CCND1_HUMAN | 295    | 0.63               | Essential         |

**Visualization**

The **heatmap** shows the attention values of the input protein in residue-level. The red regions indicate higher attention scores that contribute more to essential, and the blue regions indicate lower attention scores that contribute more to non-essential.

```
101 MEHQLLCCVEVETIRRAYPDANLLNDRVLRAMLKAEETCAPSVSYFKCVQK
102 EVLPSMRKI VATWMLVCEEQKCEEEVFLAMNYLDRFLSLEPVKRSRLQ
103 LLGATCMFVASKMKETIPLTAEKLCIYTDNSIRPEELLQMEILLVNLKWN
104 NLAAMT PHDFIEHFLSKMPEAEENKQIIRKHAQTFVALCATDVRFISNPP
105 SMVAAGSVAAVQGENLNRSPANFLSYRLTRFLSRVTRKCDPDCLRACQEQ
106 IEALLLESSLRQAQQNMDPKAAEEEEEEEEVLDLACTPTDVRDVI
```

The **lineplot** shows the attention values of the attention values of residues. The attention values are displayed when hovering.

Feedback

Copyright © 2016-CSU-Bioinformatics Group. All Right Reserved CSU-Bioinformatics CSU-Li Group

**Fig. S6.** User interface of DeepCellEss web server for cell line-specific essential protein prediction.

## 2. Supplementary Tables

**Table S1.** The AUROC and AUPRC of independent test sets for 323 cell lines

|    | Cell line    | AUROC | AUPRC |    | Cell line  | AUROC | AUPRC |
|----|--------------|-------|-------|----|------------|-------|-------|
| 1  | 22RV1        | 0.749 | 0.747 | 43 | COLO-824   | 0.786 | 0.787 |
| 2  | 23132-87     | 0.767 | 0.752 | 44 | COR-L23    | 0.769 | 0.767 |
| 3  | 42-MG-BA     | 0.761 | 0.755 | 45 | D-423MG    | 0.713 | 0.728 |
| 4  | 769-P        | 0.757 | 0.746 | 46 | D-502MG    | 0.785 | 0.782 |
| 5  | 8-MG-BA      | 0.777 | 0.782 | 47 | D-542MG    | 0.761 | 0.756 |
| 6  | A172         | 0.756 | 0.727 | 48 | DAN-G      | 0.746 | 0.74  |
| 7  | A2058        | 0.743 | 0.739 | 49 | DBTRG-05MG | 0.74  | 0.732 |
| 8  | A253         | 0.744 | 0.731 | 50 | Detroit562 | 0.744 | 0.723 |
| 9  | A2780        | 0.752 | 0.751 | 51 | DiFi       | 0.731 | 0.734 |
| 10 | A2780ADR     | 0.752 | 0.746 | 52 | DK-MG      | 0.722 | 0.714 |
| 11 | A2780cis     | 0.77  | 0.772 | 53 | DOK        | 0.78  | 0.787 |
| 12 | A375         | 0.787 | 0.775 | 54 | DOV13      | 0.745 | 0.718 |
| 13 | A549         | 0.745 | 0.753 | 55 | DU-145     | 0.772 | 0.765 |
| 14 | AGS          | 0.751 | 0.756 | 56 | EBC-1      | 0.739 | 0.746 |
| 15 | AM-38        | 0.683 | 0.682 | 57 | EC-GI-10   | 0.737 | 0.728 |
| 16 | ARH-77       | 0.754 | 0.73  | 58 | EFO-21     | 0.7   | 0.703 |
| 17 | AsPC-1       | 0.73  | 0.725 | 59 | EFO-27     | 0.752 | 0.747 |
| 18 | AU565        | 0.718 | 0.723 | 60 | EGI-1      | 0.795 | 0.803 |
| 19 | BB30-HNC     | 0.802 | 0.809 | 61 | EPLC-272H  | 0.78  | 0.782 |
| 20 | BE2-M17      | 0.741 | 0.734 | 62 | ES-2       | 0.745 | 0.751 |
| 21 | Becker       | 0.756 | 0.749 | 63 | ES4        | 0.756 | 0.755 |
| 22 | BHY          | 0.761 | 0.739 | 64 | ES5        | 0.737 | 0.748 |
| 23 | BICR10       | 0.766 | 0.772 | 65 | ES8        | 0.767 | 0.766 |
| 24 | BICR22       | 0.768 | 0.765 | 66 | ESO26      | 0.735 | 0.72  |
| 25 | BICR78       | 0.768 | 0.766 | 67 | ESO51      | 0.739 | 0.726 |
| 26 | BxPC-3       | 0.742 | 0.743 | 68 | ESS-1      | 0.749 | 0.741 |
| 27 | C2BBel       | 0.805 | 0.803 | 69 | EVSA-T     | 0.778 | 0.769 |
| 28 | Ca9-22       | 0.744 | 0.732 | 70 | EW-1       | 0.768 | 0.758 |
| 29 | CAL-27       | 0.766 | 0.768 | 71 | EW-16      | 0.746 | 0.748 |
| 30 | CAL-33       | 0.77  | 0.749 | 72 | EW-22      | 0.773 | 0.771 |
| 31 | CAL-51       | 0.745 | 0.725 | 73 | EW-7       | 0.764 | 0.752 |
| 32 | CAL-72       | 0.781 | 0.773 | 74 | FADU       | 0.789 | 0.777 |
| 33 | Caov-4       | 0.746 | 0.74  | 75 | FLO-1      | 0.736 | 0.732 |
| 34 | CAPAN-1      | 0.759 | 0.751 | 76 | GAMG       | 0.71  | 0.714 |
| 35 | CAS-1        | 0.765 | 0.762 | 77 | GB-1       | 0.783 | 0.777 |
| 36 | CHP-212      | 0.768 | 0.763 | 78 | GI-1       | 0.758 | 0.749 |
| 37 | CL-11        | 0.766 | 0.776 | 79 | GP5d       | 0.809 | 0.8   |
| 38 | COLO-205     | 0.757 | 0.744 | 80 | HARA       | 0.769 | 0.767 |
| 39 | COLO-320-HSR | 0.77  | 0.765 | 81 | HCC-15     | 0.769 | 0.76  |
| 40 | COLO-678     | 0.771 | 0.773 | 82 | HCC-78     | 0.718 | 0.706 |
| 41 | COLO-680N    | 0.735 | 0.73  | 83 | HCC1143    | 0.759 | 0.747 |
| 42 | COLO-684     | 0.781 | 0.792 | 84 | HCC1187    | 0.76  | 0.76  |

|     | <b>Cell line</b> | <b>AUROC</b> | <b>AUPRC</b> |     | <b>Cell line</b> | <b>AUROC</b> | <b>AUPRC</b> |
|-----|------------------|--------------|--------------|-----|------------------|--------------|--------------|
| 85  | HCC1395          | 0.754        | 0.765        | 131 | KP-4             | 0.748        | 0.737        |
| 86  | HCC1806          | 0.756        | 0.756        | 132 | KP-N-YN          | 0.797        | 0.778        |
| 87  | HCC1937          | 0.715        | 0.695        | 133 | KP-N-YS          | 0.753        | 0.724        |
| 88  | HCC1954          | 0.773        | 0.77         | 134 | KURAMOCHI        | 0.719        | 0.705        |
| 89  | HCC2998          | 0.76         | 0.718        | 135 | KYAE-1           | 0.765        | 0.767        |
| 90  | HCC38            | 0.764        | 0.757        | 136 | KYSE-140         | 0.796        | 0.79         |
| 91  | HCC70            | 0.784        | 0.791        | 137 | KYSE-150         | 0.776        | 0.779        |
| 92  | HCE-4            | 0.774        | 0.775        | 138 | KYSE-220         | 0.773        | 0.775        |
| 93  | HCT-116          | 0.782        | 0.795        | 139 | KYSE-270         | 0.74         | 0.744        |
| 94  | HCT-15           | 0.752        | 0.74         | 140 | KYSE-410         | 0.752        | 0.77         |
| 95  | HEC-1            | 0.753        | 0.756        | 141 | KYSE-450         | 0.742        | 0.721        |
| 96  | Hey              | 0.745        | 0.747        | 142 | KYSE-510         | 0.751        | 0.744        |
| 97  | HGC-27           | 0.756        | 0.75         | 143 | KYSE-520         | 0.768        | 0.759        |
| 98  | HO-1-u-1         | 0.741        | 0.739        | 144 | KYSE-70          | 0.775        | 0.766        |
| 99  | HOP-62           | 0.792        | 0.781        | 145 | L-363            | 0.757        | 0.753        |
| 100 | HPAF-II          | 0.763        | 0.783        | 146 | LB1047-RCC       | 0.766        | 0.753        |
| 101 | Hs-578-T         | 0.741        | 0.734        | 147 | LB771-HNC        | 0.8          | 0.807        |
| 102 | Hs-683           | 0.727        | 0.73         | 148 | LC-1-sq          | 0.738        | 0.741        |
| 103 | HSC-3            | 0.786        | 0.78         | 149 | LCLC-97TM1       | 0.764        | 0.769        |
| 104 | HSC-39           | 0.756        | 0.735        | 150 | LK-2             | 0.749        | 0.751        |
| 105 | HSC-4            | 0.784        | 0.772        | 151 | LN-229           | 0.765        | 0.751        |
| 106 | HT-29            | 0.746        | 0.745        | 152 | LNCaP-Clone-FGC  | 0.768        | 0.741        |
| 107 | HT55             | 0.762        | 0.752        | 153 | LNZTA3WT4        | 0.758        | 0.737        |
| 108 | hTERT-RPE-1      | 0.764        | 0.767        | 154 | LOU-NH91         | 0.75         | 0.755        |
| 109 | HuP-T3           | 0.769        | 0.758        | 155 | LoVo             | 0.764        | 0.774        |
| 110 | HuP-T4           | 0.783        | 0.762        | 156 | LP-1             | 0.772        | 0.775        |
| 111 | IGROV-1          | 0.739        | 0.729        | 157 | LS-123           | 0.79         | 0.809        |
| 112 | IM-9             | 0.732        | 0.727        | 158 | LS-180           | 0.746        | 0.749        |
| 113 | IM-95            | 0.767        | 0.769        | 159 | LS-411N          | 0.739        | 0.736        |
| 114 | IST-MEL1         | 0.738        | 0.752        | 160 | LS-513           | 0.747        | 0.744        |
| 115 | JHOS-2           | 0.719        | 0.698        | 161 | LS1034           | 0.785        | 0.784        |
| 116 | JHOS-4           | 0.755        | 0.752        | 162 | LU-65            | 0.716        | 0.716        |
| 117 | JHU-011          | 0.769        | 0.754        | 163 | LU-99A           | 0.758        | 0.753        |
| 118 | JHU-022          | 0.778        | 0.768        | 164 | LXF-289          | 0.783        | 0.787        |
| 119 | JHU-029          | 0.767        | 0.77         | 165 | MC-IXC           | 0.752        | 0.73         |
| 120 | JIMT-1           | 0.753        | 0.766        | 166 | MCF7             | 0.736        | 0.694        |
| 121 | KATOIII          | 0.75         | 0.763        | 167 | MDA-MB-231       | 0.731        | 0.733        |
| 122 | KINGS-1          | 0.763        | 0.761        | 168 | MDA-MB-361       | 0.718        | 0.734        |
| 123 | KLE              | 0.803        | 0.798        | 169 | MDA-MB-415       | 0.771        | 0.765        |
| 124 | KM12             | 0.789        | 0.791        | 170 | MDA-MB-436       | 0.731        | 0.723        |
| 125 | KMS-11           | 0.748        | 0.725        | 171 | MDA-MB-453       | 0.763        | 0.767        |
| 126 | KNS-42           | 0.704        | 0.726        | 172 | MDA-MB-468       | 0.715        | 0.706        |
| 127 | KNS-62           | 0.793        | 0.793        | 173 | MDST8            | 0.728        | 0.731        |
| 128 | KON              | 0.755        | 0.75         | 174 | MFE-280          | 0.768        | 0.764        |
| 129 | KP-1N            | 0.76         | 0.752        | 175 | MFE-296          | 0.763        | 0.759        |
| 130 | KP-3             | 0.764        | 0.782        | 176 | MFM-223          | 0.763        | 0.766        |



|     | <b>Cell line</b> | <b>AUROC</b> | <b>AUPRC</b> |     | <b>Cell line</b> | <b>AUROC</b> | <b>AUPRC</b> |
|-----|------------------|--------------|--------------|-----|------------------|--------------|--------------|
| 177 | MHH-ES-1         | 0.749        | 0.726        | 223 | OE21             | 0.767        | 0.76         |
| 178 | MIA-PaCa-2       | 0.749        | 0.755        | 224 | OE33             | 0.784        | 0.781        |
| 179 | MKN28            | 0.734        | 0.72         | 225 | OPM-2            | 0.761        | 0.766        |
| 180 | MOG-G-UVW        | 0.759        | 0.751        | 226 | OSC-19           | 0.77         | 0.768        |
| 181 | NB10             | 0.742        | 0.73         | 227 | OSC-20           | 0.796        | 0.791        |
| 182 | NB13             | 0.72         | 0.713        | 228 | OV-90            | 0.751        | 0.739        |
| 183 | NB17             | 0.748        | 0.75         | 229 | OVCA420          | 0.782        | 0.776        |
| 184 | NB5              | 0.763        | 0.76         | 230 | OVCAR-3          | 0.754        | 0.761        |
| 185 | NB6              | 0.758        | 0.761        | 231 | OVCAR-5          | 0.782        | 0.786        |
| 186 | NB69             | 0.751        | 0.749        | 232 | OVCAR-8          | 0.767        | 0.762        |
| 187 | NB7              | 0.75         | 0.737        | 233 | OVISE            | 0.726        | 0.725        |
| 188 | NCI-H1155        | 0.769        | 0.768        | 234 | OVK-18           | 0.768        | 0.767        |
| 189 | NCI-H1299        | 0.776        | 0.778        | 235 | OVMIU            | 0.708        | 0.705        |
| 190 | NCI-H1355        | 0.78         | 0.767        | 236 | PA-TU-8902       | 0.762        | 0.77         |
| 191 | NCI-H1568        | 0.738        | 0.748        | 237 | PA-TU-8988T      | 0.763        | 0.766        |
| 192 | NCI-H1650        | 0.771        | 0.757        | 238 | PANC-02-03       | 0.773        | 0.773        |
| 193 | NCI-H1755        | 0.777        | 0.756        | 239 | PANC-03-27       | 0.735        | 0.74         |
| 194 | NCI-H1869        | 0.702        | 0.699        | 240 | PANC-04-03       | 0.767        | 0.762        |
| 195 | NCI-H1915        | 0.772        | 0.777        | 241 | PANC-08-13       | 0.737        | 0.733        |
| 196 | NCI-H1944        | 0.744        | 0.727        | 242 | PANC-10-05       | 0.748        | 0.759        |
| 197 | NCI-H1975        | 0.731        | 0.752        | 243 | PC-14            | 0.744        | 0.738        |
| 198 | NCI-H1993        | 0.732        | 0.734        | 244 | PCI-15A          | 0.773        | 0.783        |
| 199 | NCI-H2023        | 0.777        | 0.761        | 245 | PCI-30           | 0.731        | 0.719        |
| 200 | NCI-H2087        | 0.702        | 0.718        | 246 | PCI-38           | 0.765        | 0.76         |
| 201 | NCI-H2170        | 0.756        | 0.741        | 247 | PCI-4B           | 0.765        | 0.758        |
| 202 | NCI-H226         | 0.729        | 0.742        | 248 | PCI-6A           | 0.764        | 0.756        |
| 203 | NCI-H23          | 0.769        | 0.78         | 249 | PE-CA-PJ15       | 0.747        | 0.727        |
| 204 | NCI-H3118        | 0.742        | 0.73         | 250 | PEO1             | 0.716        | 0.711        |
| 205 | NCI-H3122        | 0.742        | 0.739        | 251 | PEO4             | 0.734        | 0.73         |
| 206 | NCI-H322M        | 0.761        | 0.764        | 252 | PL4              | 0.741        | 0.734        |
| 207 | NCI-H358         | 0.745        | 0.744        | 253 | PSN1             | 0.79         | 0.791        |
| 208 | NCI-H520         | 0.742        | 0.742        | 254 | RCC-FG2          | 0.768        | 0.756        |
| 209 | NCI-H650         | 0.716        | 0.709        | 255 | RCM-1            | 0.753        | 0.75         |
| 210 | NCI-N87          | 0.796        | 0.776        | 256 | RERF-GC-1B       | 0.72         | 0.723        |
| 211 | NH-12            | 0.737        | 0.718        | 257 | RERF-LC-Sq1      | 0.731        | 0.735        |
| 212 | NMC-G1           | 0.806        | 0.797        | 258 | RKN              | 0.731        | 0.728        |
| 213 | no-10            | 0.747        | 0.744        | 259 | RKO              | 0.783        | 0.764        |
| 214 | no-11            | 0.743        | 0.742        | 260 | RL95-2           | 0.771        | 0.773        |
| 215 | NUGC-3           | 0.761        | 0.755        | 261 | RMG-I            | 0.681        | 0.695        |
| 216 | OACM5-1          | 0.732        | 0.732        | 262 | ROS-50           | 0.738        | 0.747        |
| 217 | OAW-42           | 0.719        | 0.72         | 263 | RPMI-8226        | 0.765        | 0.762        |
| 218 | OC-314           | 0.73         | 0.717        | 264 | SAS              | 0.766        | 0.765        |
| 219 | OCI-AML2         | 0.766        | 0.758        | 265 | SCC-4            | 0.753        | 0.75         |
| 220 | OCI-AML3         | 0.766        | 0.758        | 266 | SCC-9            | 0.759        | 0.774        |
| 221 | OCI-LY-19        | 0.776        | 0.774        | 267 | SCC90            | 0.743        | 0.748        |
| 222 | OCUB-M           | 0.802        | 0.8          | 268 | SCH              | 0.749        | 0.74         |

|     | <b>Cell line</b> | <b>AUROC</b> | <b>AUPRC</b> |     | <b>Cell line</b> | <b>AUROC</b> | <b>AUPRC</b> |
|-----|------------------|--------------|--------------|-----|------------------|--------------|--------------|
| 269 | SF126            | 0.78         | 0.784        | 297 | SW1573           | 0.781        | 0.771        |
| 270 | SF295            | 0.727        | 0.721        | 298 | SW1990           | 0.786        | 0.789        |
| 271 | SF539            | 0.749        | 0.739        | 299 | SW48             | 0.761        | 0.773        |
| 272 | SJSA-1           | 0.762        | 0.765        | 300 | SW620            | 0.763        | 0.751        |
| 273 | SK-GT-4          | 0.763        | 0.764        | 301 | SW626            | 0.735        | 0.712        |
| 274 | SK-MEL-2         | 0.806        | 0.798        | 302 | SW837            | 0.779        | 0.773        |
| 275 | SK-MES-1         | 0.753        | 0.754        | 303 | T-T              | 0.781        | 0.786        |
| 276 | SK-MG-1          | 0.754        | 0.739        | 304 | T47D             | 0.788        | 0.791        |
| 277 | SK-N-AS          | 0.755        | 0.749        | 305 | T84              | 0.799        | 0.792        |
| 278 | SK-N-DZ          | 0.737        | 0.742        | 306 | T98G             | 0.782        | 0.76         |
| 279 | SK-N-FI          | 0.732        | 0.712        | 307 | TC-71            | 0.764        | 0.76         |
| 280 | SK-N-SH          | 0.73         | 0.713        | 308 | TE-10            | 0.784        | 0.769        |
| 281 | SK-PN-DW         | 0.793        | 0.783        | 309 | TE-4             | 0.765        | 0.755        |
| 282 | SKN-3            | 0.758        | 0.746        | 310 | TE-5             | 0.79         | 0.799        |
| 283 | SNB75            | 0.749        | 0.761        | 311 | TE-8             | 0.743        | 0.753        |
| 284 | SNG-M            | 0.731        | 0.726        | 312 | TE-9             | 0.761        | 0.767        |
| 285 | SNU-1            | 0.757        | 0.741        | 313 | TGW              | 0.762        | 0.734        |
| 286 | SNU-16           | 0.77         | 0.767        | 314 | TMK-1            | 0.776        | 0.764        |
| 287 | SNU-61           | 0.784        | 0.777        | 315 | TOV-112D         | 0.752        | 0.763        |
| 288 | SNU-81           | 0.745        | 0.735        | 316 | TOV-21G          | 0.753        | 0.755        |
| 289 | SNU-C1           | 0.825        | 0.826        | 317 | TYK-nu           | 0.744        | 0.739        |
| 290 | SNU-C5           | 0.807        | 0.791        | 318 | U-87-MG          | 0.752        | 0.749        |
| 291 | SU-DHL-10        | 0.712        | 0.699        | 319 | U251             | 0.787        | 0.789        |
| 292 | SU-DHL-5         | 0.771        | 0.769        | 320 | UACC-893         | 0.742        | 0.747        |
| 293 | SU-DHL-8         | 0.764        | 0.759        | 321 | UWB1.289         | 0.757        | 0.758        |
| 294 | SU8686           | 0.774        | 0.783        | 322 | VMRC-LCD         | 0.756        | 0.756        |
| 295 | SUIT-2           | 0.76         | 0.766        | 323 | YH-13            | 0.778        | 0.781        |
| 296 | SW1088           | 0.699        | 0.713        |     |                  |              |              |
